# Supplementary material for: Spatiotemporal overlap between Siberian roe deer (Capreolus pygargus tianschanicus) and sympatric mammalian species on Jeju Island, South Korea
Source: publisher site journal article supplement (doi:10.1515/mammalia-2022-0059), 2022-12-23
Supplement: Supplementary file 1 [file j_mammalia-2022-0059_suppl.docx]

**Supplementary Material**

**Spatiotemporal overlap between Siberian roe deer** **(*Capreolus pygargus tianschanicus*) and sympatric mammalian species on Jeju Island**, **South Korea**

Maniram Banjade et al.

DOI 10.1515/mammalia-2022-0059


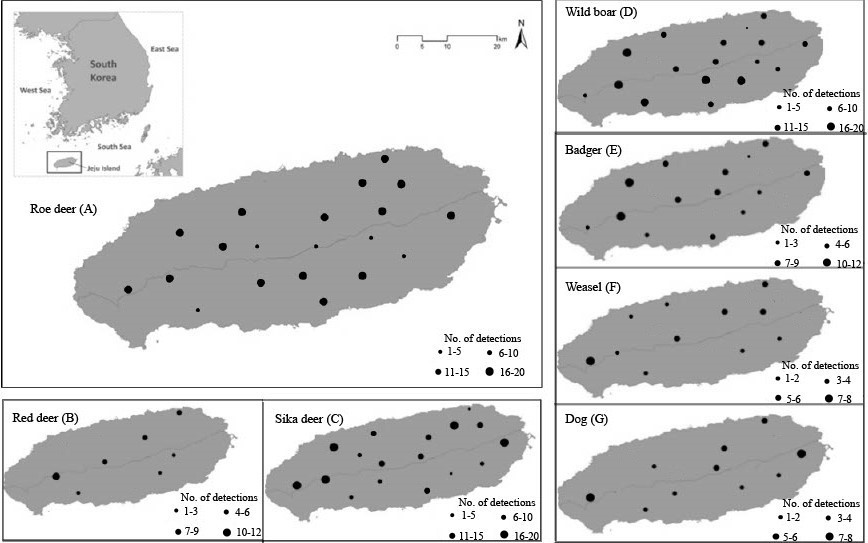


**Supplementary Figure S1:** Spatial patterns of detection frequency for animal species in the camera-trapping study area from October 2017 to September 2020. Black points on each map represent species detection sites and their size indicates detection frequency.
